# Supplementary material
Source: Springer Nature journal article supplement (https://www.springermedizin.de/resource/supplementary/12889_2011_3835_MOESM2_ESM.pdf/9491356)

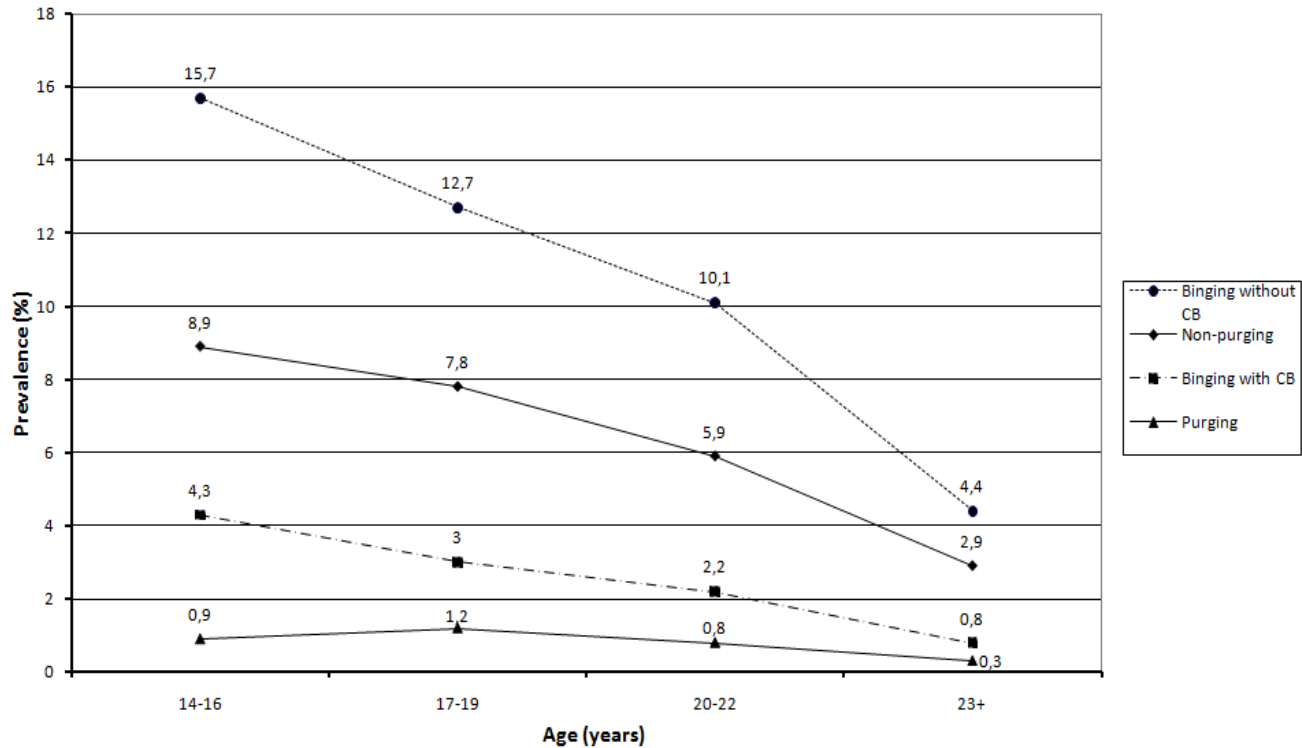

Supplement: MOESM2 [file 9491356]
